# Supplementary material for: Soil Fungal Diversity and Ecology Assessed Using DNA Metabarcoding along a Deglaciated Chronosequence at Clearwater Mesa, James Ross Island, Antarctic Peninsula
Source: MDPI journal article supplement (doi:10.3390/biology12020275), 2023-02-09
Supplement: s1 [file s1]

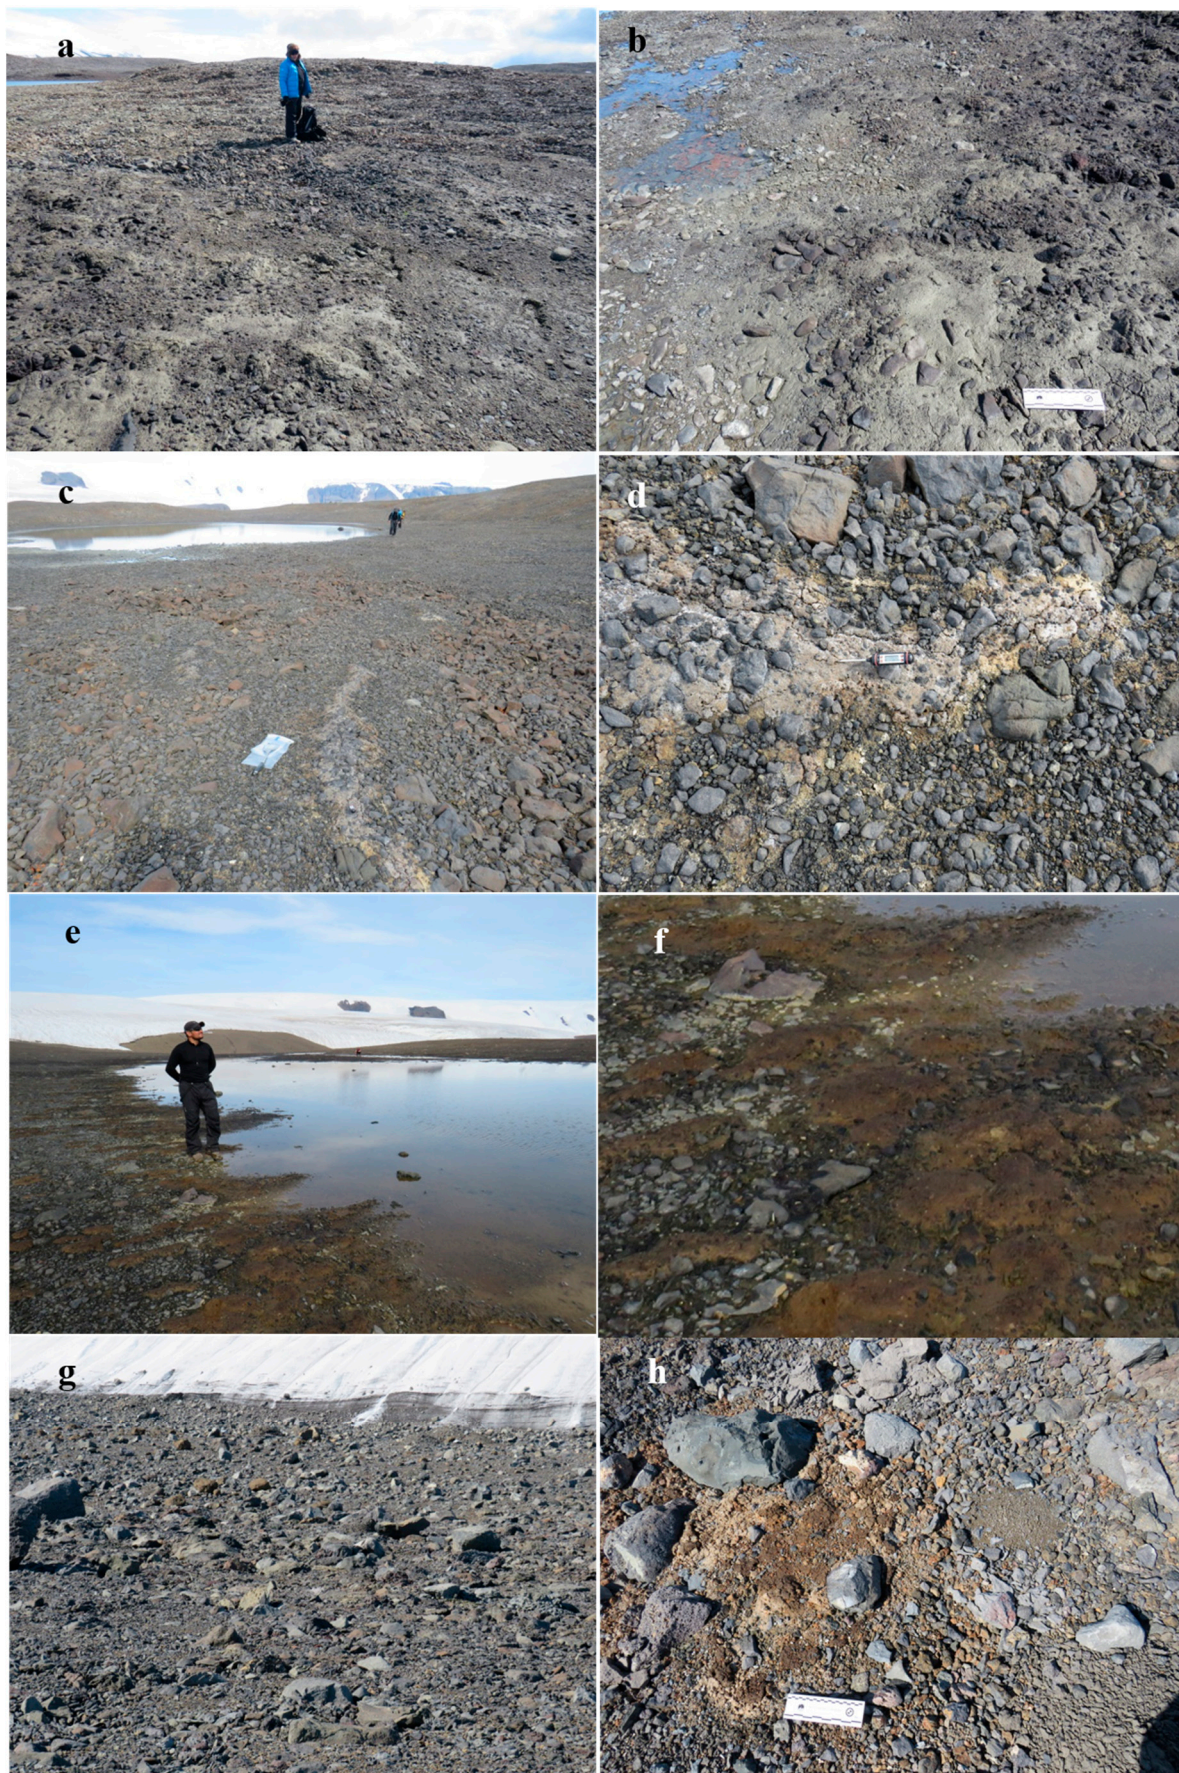

**Figure S1.** General and detailed images of the soils sampled at (a, b) site 1, (c, d) site 2, (e, f) site 3 and (g, h) site 4 on Clearwater Mesa, James Ross Island, Antarctic Peninsula. Photos taken by Juan Lirio.

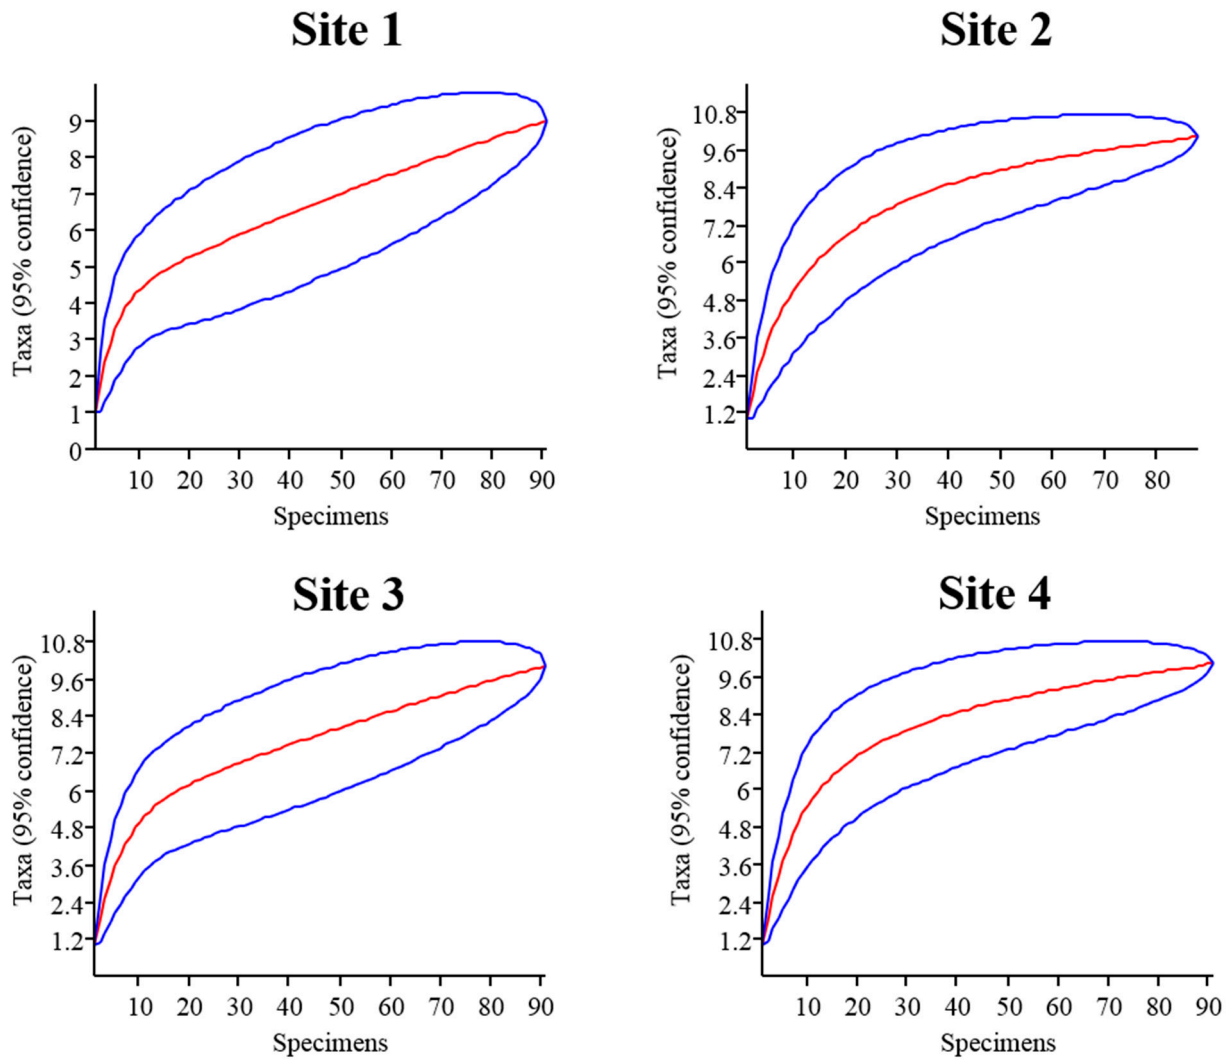

**Figure S2.** Rarefaction curves, with 95% confidence limits, of fungal amplicon sequence variants (ASVs) obtained from the four soils sampled at Clearwater Mesa, James Ross Island, Antarctic Peninsula.

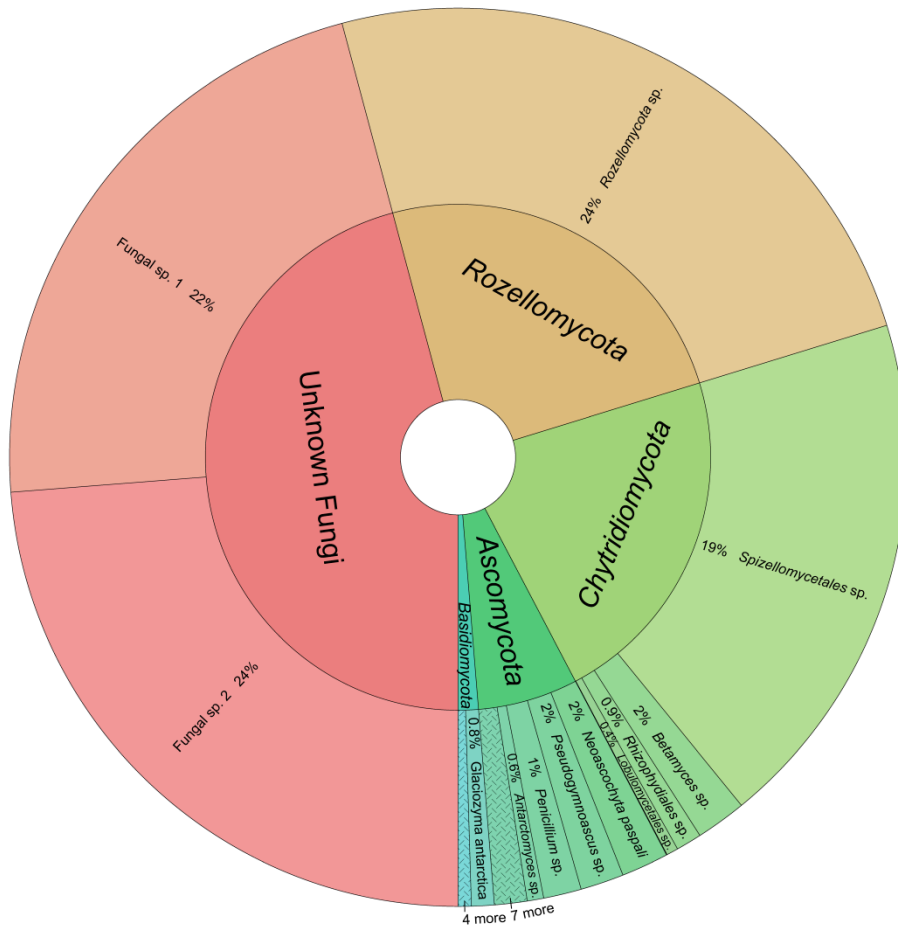

**(a)**

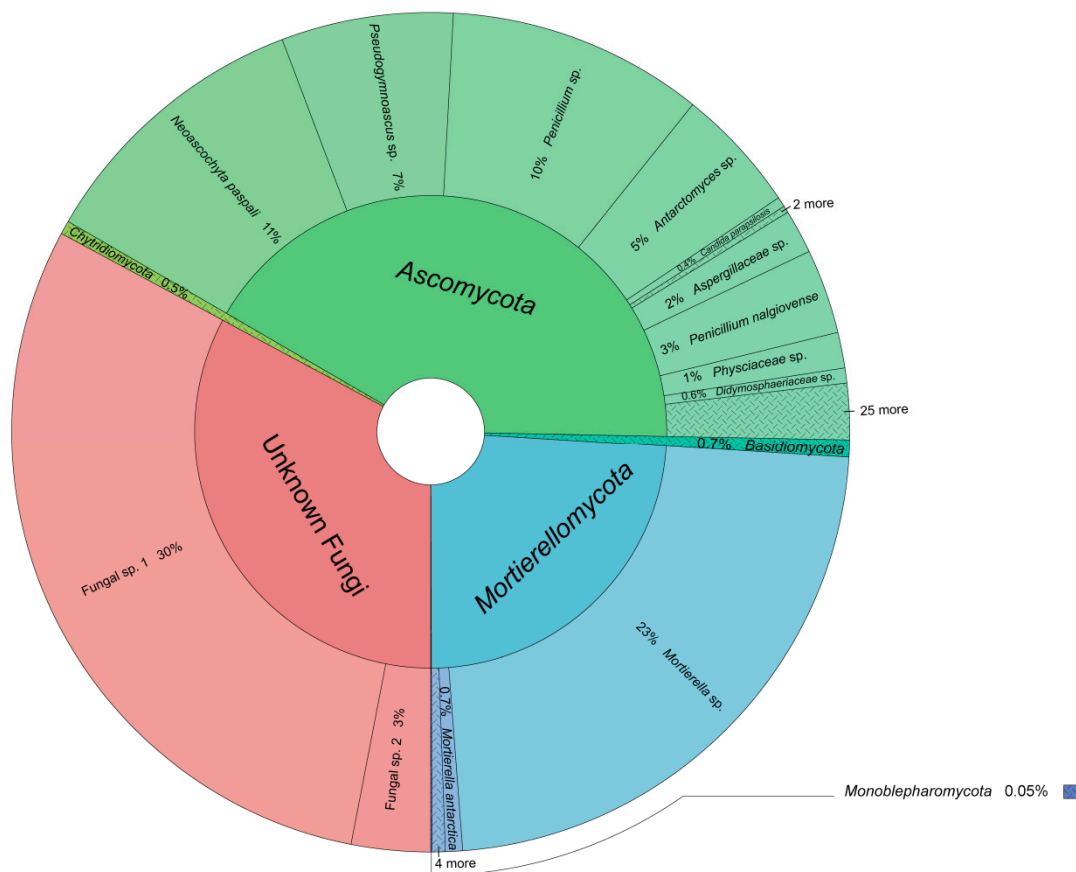

(b)

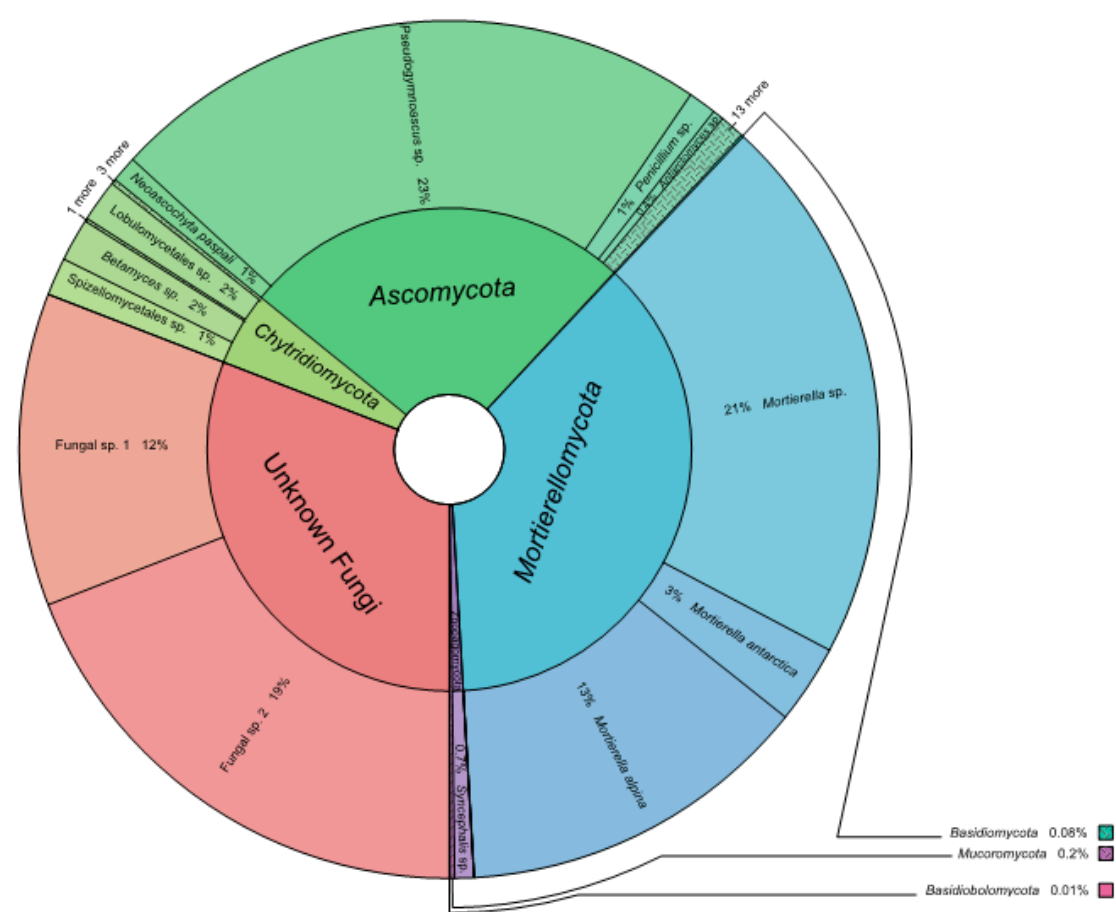

(c)



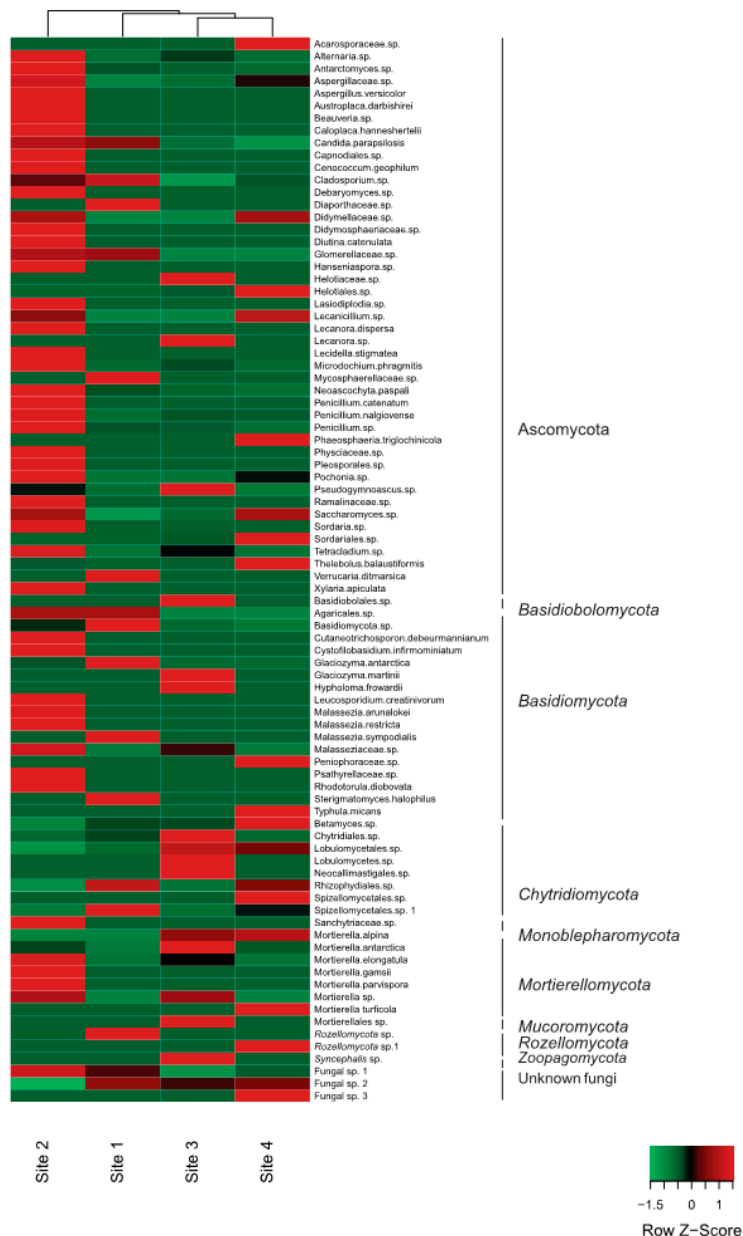

**Figure S4.** Heat map of fungal assemblage relative abundances detected in the four soils sampled. The color intensities range from red (highest relative abundance) to green (lowest relative abundance). These values represent percentages of DNA fungal reads from sites 1, 2, 3 and 4 at Clearwater Mesa, James Ross Island, Antarctic Peninsula. The heatmap of ASV abundance was created using the following parameters: Average Linkage, Spearman Rank Correlation, and Z-score among samples for each ASV.

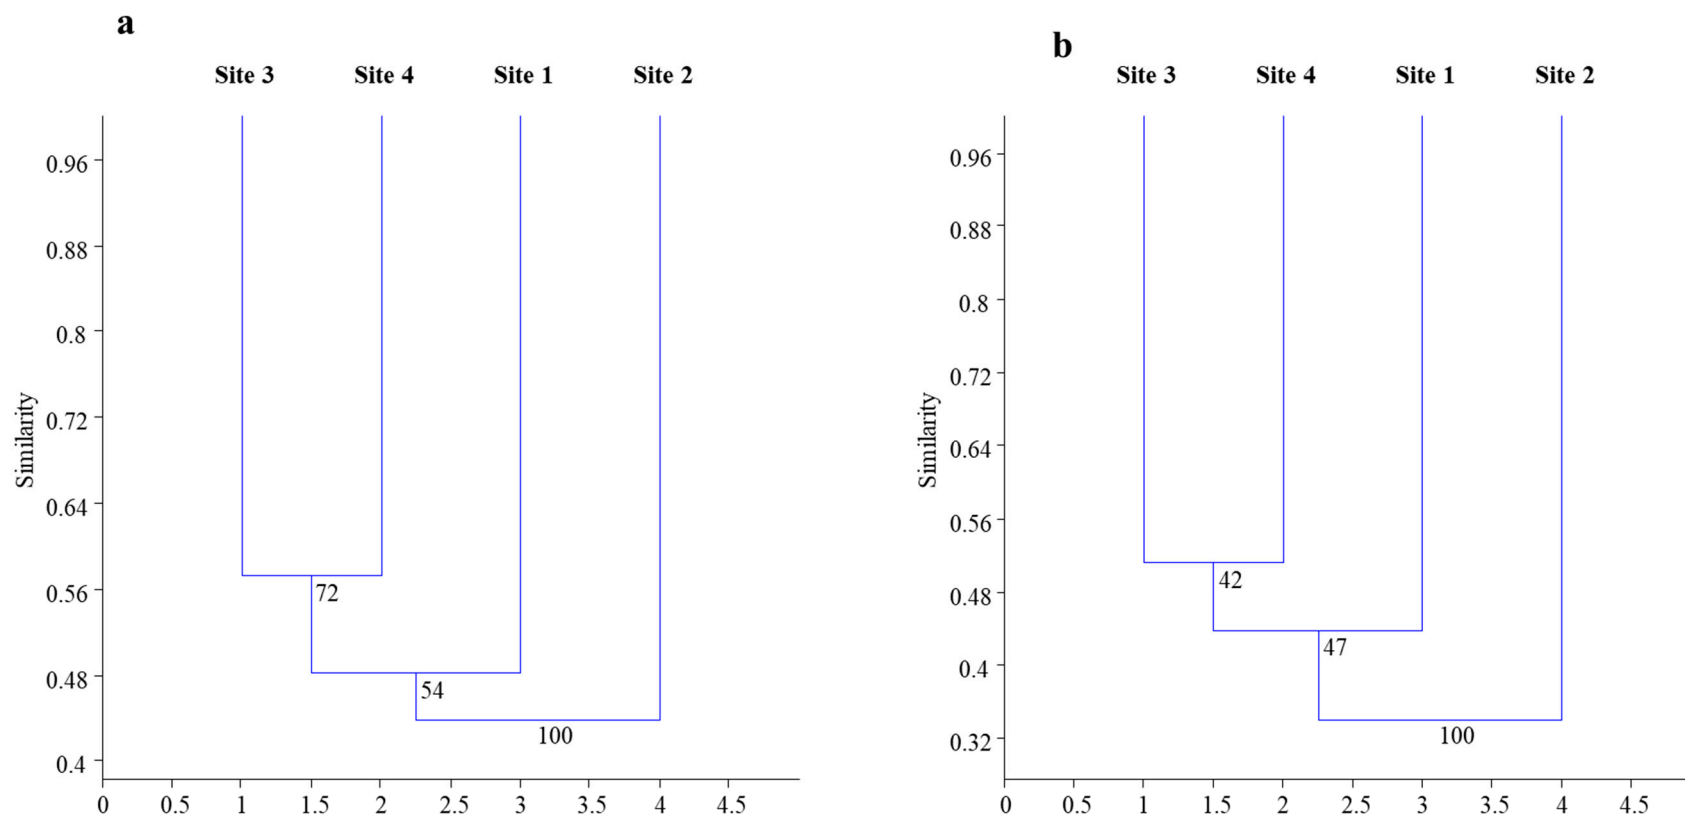

**Figure S5.** Dendrograms showing the Sorensen (**a**) and (**b**) Bray-Curtis similarity measures for the fungal assemblages detected in soils sampled from the four sites on Clearwater Mesa, James Ross Island, Antarctic Peninsula. The results were obtained with 95% confidence and bootstrap values calculated from 1,000 iterations.

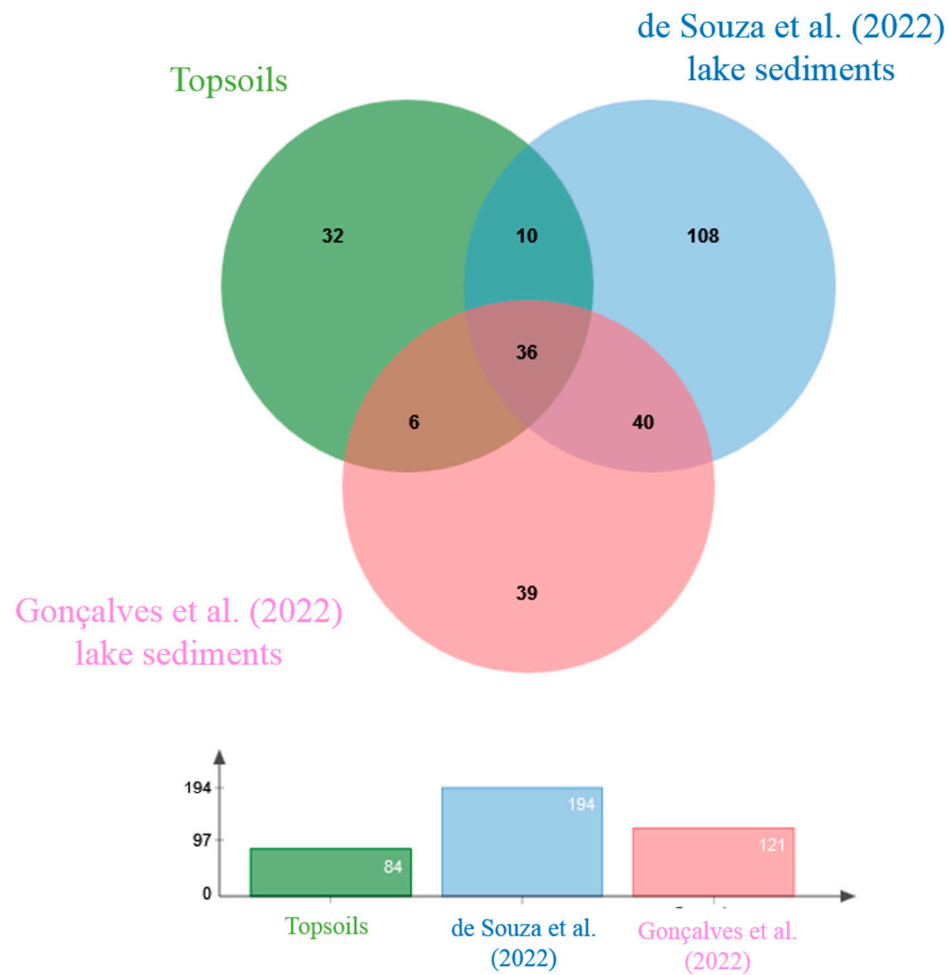

**Common fungi in topsoils and lake sediments (de Souza et al. 2022 and Gonçalves et al. 2022):**

|                                  |                                            |
|----------------------------------|--------------------------------------------|
| <i>Pseudogymnoascus</i> sp.      | <i>Cutaneotrichosporon debeurmannianum</i> |
| <i>Neoascochyta paspali</i>      | <i>Malassezia arunalokei</i>               |
| <i>Penicillium</i> sp.           | <i>Leucosporidium creatinivorum</i>        |
| <i>Thelebolus balaustiformis</i> | <i>Mortierella alpina</i>                  |
| <i>Antarctomyces</i> sp.         | <i>Mortierella antarctica</i>              |
| <i>Penicillium nalgiovense</i>   | <i>Betamyces</i> sp.                       |
| <i>Aspergillaceae</i> sp.        | <i>Lobulomycetales</i> sp.                 |
| <i>Ciliophora</i> sp.            | <i>Spizellomycetales</i> sp.               |
| <i>Helotiales</i> sp.            | <i>Rhizophydiales</i> sp.                  |
| <i>Candida parapsilosis</i>      | <i>Chytridiales</i> sp.                    |
| <i>Didymosphaeriaceae</i> sp.    | <i>Lobulomycetes</i> sp.                   |
| <i>Cladosporium</i> sp.          | <i>Basidiobolales</i> sp.                  |
| <i>Didymellaceae</i> sp.         | <i>Agaricales</i> sp.                      |
| <i>Microdochium phragmitis</i>   | <i>Basidiomycota</i> sp.                   |
| <i>Saccharomyces</i> sp.         | <i>Sordariales</i> sp.                     |
| <i>Tetracladium</i> sp.          | <i>Mortierellales</i> sp.                  |
| <i>Glaciozyma antarctica</i>     | <i>Fungal</i> sp.                          |
| <i>Malassezia restricta</i>      |                                            |

**Figure S6.** Venn diagram showing the overlap in distribution of fungal amplicon sequence variants (ASVs) among the soils and lake sediments analyzed in the current study and by de Souza et al. (2022) and Gonçalves et al. (2022) at Clearwater Mesa, James Ross Island, Antarctic Pensinsula.

**Table S1.** Relative abundances of the fungal amplicon sequence variants (ASVs) detected in four soils sampled from Clearwater Mesa, James Ross Island, Antarctic Peninsula.

| Database | Kingdom | Phylum     | Fungal amplicon variant sequence (ASV) | Relative abundance (%) of fungal ASVs |        |        |        |
|----------|---------|------------|----------------------------------------|---------------------------------------|--------|--------|--------|
|          |         |            |                                        | Site 1                                | Site 2 | Site 3 | Site 4 |
| UNITE    | Fungi   | Ascomycota | <i>Pseudogymnoascus</i> sp.            | 1.529                                 | 6.627  | 22.650 | 0.252  |
|          |         |            | <i>Neosascochyta paspali</i>           | 1.663                                 | 10.873 | 0.991  | 0.535  |
|          |         |            | <i>Penicillium</i> sp.                 | 1.334                                 | 9.887  | 1.059  | 0.462  |
|          |         |            | <i>Thelebolus balaustiformis</i>       | 0.000                                 | 0.136  | 0.064  | 5.843  |
|          |         |            | <i>Antarctomyces</i> sp.               | 0.579                                 | 4.828  | 0.415  | 0.214  |
|          |         |            | <i>Penicillium nalgiovense</i>         | 0.000                                 | 3.261  | 0.310  | 0.237  |
|          |         |            | <i>Aspergillaceae</i> sp.              | 0.074                                 | 1.696  | 0.251  | 0.764  |
|          |         |            | <i>Ciliophora</i> sp.                  | 2.334                                 | 0.000  | 0.007  | 0.000  |
|          |         |            | <i>Helotiales</i> sp.                  | 0.000                                 | 0.000  | 0.029  | 1.837  |
|          |         |            | <i>Physciaceae</i> sp.                 | 0.000                                 | 1.375  | 0.000  | 0.000  |
|          |         |            | <i>Candida parapsilosis</i>            | 0.320                                 | 0.387  | 0.133  | 0.073  |
|          |         |            | <i>Lecanicillium</i> sp.               | 0.000                                 | 0.369  | 0.000  | 0.471  |
|          |         |            | <i>Didymosphaeriaceae</i> sp.          | 0.000                                 | 0.579  | 0.000  | 0.000  |
|          |         |            | <i>Cladosporium</i> sp.                | 0.265                                 | 0.174  | 0.020  | 0.097  |
|          |         |            | <i>Diaporthaceae</i> sp.               | 0.333                                 | 0.000  | 0.000  | 0.000  |
|          |         |            | <i>Ramalinaceae</i> sp.                | 0.000                                 | 0.294  | 0.000  | 0.000  |
|          |         |            | <i>Didymellaceae</i> sp.               | 0.000                                 | 0.117  | 0.000  | 0.114  |
|          |         |            | <i>Pochonia</i> sp.                    | 0.000                                 | 0.148  | 0.000  | 0.041  |
|          |         |            | <i>Aspergillus versicolor</i>          | 0.000                                 | 0.187  | 0.000  | 0.000  |
|          |         |            | <i>Microdochium phragmitis</i>         | 0.000                                 | 0.158  | 0.017  | 0.000  |
|          |         |            | <i>Glomerellaceae</i> sp.              | 0.080                                 | 0.089  | 0.000  | 0.000  |
|          |         |            | <i>Beauveria</i> sp.                   | 0.000                                 | 0.127  | 0.000  | 0.000  |
|          |         |            | <i>Saccharomyces</i> sp.               | 0.000                                 | 0.048  | 0.013  | 0.050  |
|          |         |            | <i>Cenococcum geophilum</i>            | 0.000                                 | 0.102  | 0.000  | 0.000  |
|          |         |            | <i>Tetracladium</i> sp.                | 0.000                                 | 0.063  | 0.019  | 0.000  |
|          |         |            | <i>Alternaria</i> sp.                  | 0.000                                 | 0.064  | 0.011  | 0.000  |

|                      |                                            |       |       |       |       |
|----------------------|--------------------------------------------|-------|-------|-------|-------|
|                      | <i>Acarosporaceae</i> sp.                  | 0.000 | 0.000 | 0.000 | 0.067 |
|                      | <i>Penicillium catenatum</i>               | 0.000 | 0.058 | 0.000 | 0.000 |
|                      | <i>Caloplaca hanneshtertelii</i>           | 0.000 | 0.055 | 0.000 | 0.000 |
|                      | <i>Pleosporales</i> sp.                    | 0.000 | 0.054 | 0.000 | 0.000 |
|                      | <i>Sordaria</i> sp.                        | 0.000 | 0.049 | 0.000 | 0.000 |
|                      | <i>Lecanora</i> sp.                        | 0.000 | 0.000 | 0.047 | 0.000 |
|                      | <i>Verrucaria ditmarsica</i>               | 0.042 | 0.000 | 0.000 | 0.000 |
|                      | <i>Mycosphaerellaceae</i> sp.              | 0.035 | 0.000 | 0.000 | 0.000 |
|                      | <i>Diutina catenulata</i>                  | 0.000 | 0.030 | 0.000 | 0.000 |
|                      | <i>Phaeosphaeria triglochinicola</i>       | 0.000 | 0.000 | 0.000 | 0.029 |
|                      | <i>Capnodiales</i> sp.                     | 0.000 | 0.025 | 0.000 | 0.000 |
|                      | <i>Helotiaceae</i> sp.                     | 0.000 | 0.000 | 0.016 | 0.000 |
|                      | <i>Austroplaca darbishirei</i>             | 0.000 | 0.016 | 0.000 | 0.000 |
|                      | <i>Debaryomyces</i> sp.                    | 0.000 | 0.014 | 0.000 | 0.000 |
|                      | <i>Lecidella stigmatea</i>                 | 0.000 | 0.012 | 0.000 | 0.000 |
|                      | <i>Lasioidiplodia</i> sp.                  | 0.000 | 0.012 | 0.000 | 0.000 |
|                      | <i>Xylaria apiculata</i>                   | 0.000 | 0.012 | 0.000 | 0.000 |
|                      | <i>Lecanora dispersa</i>                   | 0.000 | 0.009 | 0.000 | 0.000 |
|                      | <i>Hanseniaspora</i> sp.                   | 0.000 | 0.008 | 0.000 | 0.000 |
| <i>Basidiomycota</i> | <i>Glaciozyma antarctica</i>               | 0.799 | 0.060 | 0.000 | 0.000 |
|                      | <i>Malassezia restricta</i>                | 0.000 | 0.134 | 0.000 | 0.000 |
|                      | <i>Cutaneotrichosporon debeurmannianum</i> | 0.000 | 0.125 | 0.000 | 0.000 |
|                      | <i>Typhula micans</i>                      | 0.000 | 0.000 | 0.000 | 0.105 |
|                      | <i>Sterigmatomyces halophilus</i>          | 0.090 | 0.000 | 0.000 | 0.000 |
|                      | <i>Peniophoraceae</i> sp.                  | 0.000 | 0.000 | 0.000 | 0.082 |
|                      | <i>Malassezia arunalokei</i>               | 0.000 | 0.072 | 0.000 | 0.000 |
|                      | <i>Malassezia sympodialis</i>              | 0.070 | 0.000 | 0.000 | 0.000 |
|                      | <i>Leucosporidium creatinivorum</i>        | 0.000 | 0.066 | 0.000 | 0.000 |
|                      | <i>Malasseziaceae</i> sp.                  | 0.000 | 0.043 | 0.020 | 0.000 |
|                      | <i>Cystofilobasidium infirmominiatum</i>   | 0.000 | 0.058 | 0.000 | 0.000 |
|                      | <i>Psathyrellaceae</i> sp.                 | 0.000 | 0.021 | 0.000 | 0.000 |

|              |                           |                                |        |        |        |        |
|--------------|---------------------------|--------------------------------|--------|--------|--------|--------|
| BLASTn Fungi |                           | <i>Hypholoma frowardii</i>     | 0.000  | 0.000  | 0.020  | 0.000  |
|              |                           | <i>Glaciozyma martinii</i>     | 0.000  | 0.000  | 0.016  | 0.000  |
|              |                           | <i>Rhodotorula diobovata</i>   | 0.000  | 0.015  | 0.000  | 0.000  |
|              | <i>Mortierellomycota</i>  | <i>Mortierella</i> sp.         | 0.000  | 22.792 | 20.763 | 0.000  |
|              |                           | <i>Mortierella alpina</i>      | 0.000  | 0.328  | 13.347 | 16.475 |
|              |                           | <i>Mortierella turficola</i>   | 0.000  | 0.000  | 0.000  | 16.171 |
|              |                           | <i>Mortierella antarctica</i>  | 0.000  | 0.660  | 2.979  | 0.453  |
|              |                           | <i>Mortierella parvispora</i>  | 0.000  | 0.104  | 0.000  | 0.000  |
|              |                           | <i>Mortierella elongatula</i>  | 0.000  | 0.038  | 0.012  | 0.000  |
|              |                           | <i>Mortierella gamsii</i>      | 0.000  | 0.041  | 0.000  | 0.000  |
|              | <i>Chytridiomycota</i>    | <i>Betamyces</i> sp.           | 1.778  | 0.156  | 1.615  | 7.057  |
|              |                           | <i>Lobulomycetales</i> sp.     | 0.413  | 0.068  | 1.589  | 1.109  |
|              |                           | <i>Spizellomycetales</i> sp. 1 | 0.000  | 0.000  | 0.000  | 2.311  |
|              |                           | <i>Rhizophydiales</i> sp.      | 0.905  | 0.000  | 0.123  | 0.670  |
|              |                           | <i>Chytridiales</i> sp.        | 0.022  | 0.000  | 0.158  | 0.000  |
|              |                           | <i>Lobulomycetes</i> sp.       | 0.000  | 0.000  | 0.022  | 0.000  |
|              | <i>Rozellomycota</i>      | <i>Rozellomycota</i> sp. 1     | 23.846 | 0.000  | 0.000  | 0.000  |
|              | <i>Zoopagomycota</i>      | <i>Syncephalis</i> sp.         | 0.000  | 0.000  | 0.716  | 0.000  |
|              | <i>Basidiobolomycota</i>  | <i>Basidiobolales</i> sp.      | 0.000  | 0.000  | 0.012  | 0.000  |
|              | <i>Monoblepharomycota</i> | <i>Sanchytriaceae</i> sp.      | 0.000  | 0.046  | 0.000  | 0.000  |
|              | <i>Chytridiomycota</i>    | <i>Spizellomycetales</i> sp. 2 | 18.420 | 0.301  | 1.428  | 5.784  |
|              |                           | <i>Neocallimastigales</i> sp.  | 0.000  | 0.000  | 0.010  | 0.000  |
|              | <i>Basidiomycota</i>      | <i>Agaricales</i> sp.          | 0.019  | 0.019  | 0.000  | 0.000  |
|              |                           | <i>Basidiomycota</i> sp.       | 0.285  | 0.070  | 0.023  | 0.000  |
|              | <i>Ascomycota</i>         | <i>Sordariales</i> sp.         | 0.000  | 0.000  | 0.013  | 0.252  |
|              | <i>Rozellomycota</i>      | <i>Rozellomycota</i> sp. 2     | 0.000  | 0.000  | 0.000  | 0.032  |
|              | <i>Mucoromycota</i>       | <i>Mortierellales</i> sp.      | 0.000  | 0.000  | 0.175  | 0.000  |
|              | Unknown                   | Fungal sp. 1                   | 21.563 | 29.792 | 11.791 | 16.329 |
|              |                           | Fungal sp. 2                   | 23.204 | 3.046  | 19.103 | 22.008 |
|              |                           | Fungal sp. 3                   | 0.000  | 0.000  | 0.000  | 0.076  |

ASV = fungal sequence variant. Green indicates dominant, blue intermediate and orange minor relative abundance (see Methods).

**Table S2.** Shared fungal amplicon sequence variants (ASVs) detected in soil samples collected in Clearwater Mesa, James Ross Island, Antarctica

[illegible]

**Table S3.** Ecological profiles obtained from the FUNGuild database and specific citations at generic level of the fungi detected in soil samples obtained from Clearwater Mesa, James Ross Island, Antarctic Peninsula.

| Genus                      | Relative abundance (%) of soil fungal ASVs |        |        |        | Trophic mode                      | Guild*                                                         |
|----------------------------|--------------------------------------------|--------|--------|--------|-----------------------------------|----------------------------------------------------------------|
|                            | Site 1                                     | Site 2 | Site 3 | Site 4 |                                   |                                                                |
| <i>Alternaria</i>          | 0.000                                      | 0.064  | 0.011  | 0.000  | Pathogenic-Saprotrophic-Symbiotic | Animal Pathogen-Endophyte-Plant Pathogen-Wood Saprotrophic     |
| <i>Antarctomyces</i>       | 0.579                                      | 4.828  | 0.415  | 0.214  | Saprotrophic                      | Undefined Saprotrophic                                         |
| <i>Aspergillus</i>         | 0.000                                      | 0.187  | 0.000  | 0.000  | Pathogenic-Saprotrophic           | Animal Pathogen-Undefined Saprotrophic                         |
| <i>Austroplaca</i>         | 0.000                                      | 0.016  | 0.000  | 0.000  | Symbiotic                         | Lichenized                                                     |
| <i>Beauveria</i>           | 0.000                                      | 0.127  | 0.000  | 0.000  | Pathogenic                        | Animal Pathogen                                                |
| <i>Betamyces</i>           | 1.778                                      | 0.156  | 1.615  | 7.057  | Saprotrophic                      | Freshwater and Soil Saprotrophic (Lepelletier et al. 2014)     |
| <i>Caloplaca</i>           | 0.000                                      | 0.055  | 0.000  | 0.000  | Symbiotic                         | Lichenized                                                     |
| <i>Candida</i>             | 0.320                                      | 0.387  | 0.133  | 0.073  | Pathogenic                        | Animal Pathogen                                                |
| <i>Cenococcum</i>          | 0.000                                      | 0.102  | 0.000  | 0.000  | Symbiotic                         | Ectomycorrhizal                                                |
| <i>Ciliophora</i>          | 2.334                                      | 0.000  | 0.007  | 0.000  | Symbiotic                         | Endophyte (Sun and Guo 2007)                                   |
| <i>Cladosporium</i>        | 0.265                                      | 0.174  | 0.020  | 0.097  | Symbiotic                         | Endophyte                                                      |
| <i>Cutaneotrichosporon</i> | 0.000                                      | 0.125  | 0.000  | 0.000  | Saprotrophic                      | Undefined Saprotrophic (Li et al. 2020)                        |
| <i>Cystofilobasidium</i>   | 0.000                                      | 0.058  | 0.000  | 0.000  | Pathogenic                        | Fungal Parasite                                                |
| <i>Debaryomyces</i>        | 0.000                                      | 0.014  | 0.000  | 0.000  | Saprotrophic                      | Undefined Saprotrophic                                         |
| <i>Diutina</i>             | 0.000                                      | 0.030  | 0.000  | 0.000  | Pathogenic                        | Animal Pathogen (Ming et al. 2019)                             |
| <i>Glaciozyma</i>          | 0.799                                      | 0.060  | 0.016  | 0.000  | Saprotrophic                      | Undefined Saprotrophic (Sampaio 2011)                          |
| <i>Hanseniaspora</i>       | 0.000                                      | 0.008  | 0.000  | 0.000  | Pathogenic-Saprotrophic           | Animal Pathogen-Fruits (Fleet et al. 2002; Saubin et al. 2020) |
| <i>Hypholoma</i>           | 0.000                                      | 0.000  | 0.020  | 0.000  | Saprotrophic                      | Undefined Saprotroph                                           |
| <i>Lasiodiplodia</i>       | 0.000                                      | 0.012  | 0.000  | 0.000  | Pathogenic                        | Plant Pathogen                                                 |
| <i>Lecanicillium</i>       | 0.000                                      | 0.369  | 0.000  | 0.471  | Pathogenic                        | Animal Pathogen                                                |
| <i>Lecanora</i>            | 0.000                                      | 0.009  | 0.047  | 0.000  | Symbiotic                         | Lichenized                                                     |
| <i>Lecidella</i>           | 0.000                                      | 0.012  | 0.000  | 0.000  | Symbiotic                         | Lichenized                                                     |

|                         |       |        |        |        |                                   |                                                                                     |
|-------------------------|-------|--------|--------|--------|-----------------------------------|-------------------------------------------------------------------------------------|
| <i>Leucosporidium</i>   | 0.000 | 0.066  | 0.000  | 0.000  | Saprotrophic                      | Soil Saprotrophic-Undefined Saprotrophic                                            |
| <i>Malassezia</i>       | 0.070 | 0.206  | 0.000  | 0.000  | Pathogenic                        | Animal Pathogen                                                                     |
| <i>Microdochium</i>     | 0.000 | 0.158  | 0.017  | 0.000  | Pathogenic-Symbiotic              | Endophyte-Plant Pathogen                                                            |
| <i>Mortierella</i>      | 0.000 | 23.963 | 37.101 | 33.099 | Saprotrophic-Symbiotic            | Endophyte-Litter Saprotrophic-Soil Saprotrophic-Undefined Saprotrophic              |
| <i>Neosascochyta</i>    | 1.663 | 10.873 | 0.991  | 0.535  | Pathogenic                        | Plant Pathogen (Golzar et al. 2019)                                                 |
| <i>Penicillium</i>      | 1.334 | 13.206 | 1.369  | 0.699  | Saprotrophic                      | Dung Saprotrophic-Undefined Saprotrophic-Wood Saprotrophic                          |
| <i>Phaeosphaeria</i>    | 0.000 | 0.000  | 0.000  | 0.029  | Saprotrophic                      | Undefined Saprotrophic                                                              |
| <i>Pochonia</i>         | 0.000 | 0.148  | 0.000  | 0.041  | Pathogenic                        | Animal Pathogen                                                                     |
| <i>Pseudogymnoascus</i> | 1.529 | 6.627  | 22.650 | 0.252  | Pathogenic-Saprotrophic-Symbiotic | Animal pathogen-Soil Saprotrophic                                                   |
| <i>Rhodotorula</i>      | 0.000 | 0.015  | 0.000  | 0.000  | Pathogenic-Saprotrophic           | Animal Endosymbiont-Animal Pathogen-Endophyte-Plant Pathogen-Undefined Saprotrophic |
| <i>Saccharomyces</i>    | 0.000 | 0.048  | 0.013  | 0.050  | Saprotrophic                      | Undefined Saprotrophic                                                              |
| <i>Sordaria</i>         | 0.000 | 0.049  | 0.000  | 0.000  | Saprotrophic                      | Dung Saprotrophic -Wood Saprotrophic                                                |
| <i>Sterigmatomyces</i>  | 0.090 | 0.000  | 0.000  | 0.000  | Saprotrophic                      | Saprotrophic and halotolerant (Al-Tohamy et al. 2020)                               |
| <i>Syncephalis</i>      | 0.000 | 0.000  | 0.716  | 0.000  | Pathogenic                        | Fungal Parasite                                                                     |
| <i>Tetracladium</i>     | 0.000 | 0.063  | 0.019  | 0.000  | Saprotrophic                      | Undefined Saprotrophic                                                              |
| <i>Thelebolus</i>       | 0.000 | 0.136  | 0.064  | 5.843  | Saprotrophic-Symbiotic            | Dung Saprotrophic-Endophyte-Undefined Saprotrophic                                  |
| <i>Typhula</i>          | 0.000 | 0.000  | 0.000  | 0.105  | Pathogenic                        | Plant Pathogen                                                                      |
| <i>Verrucaria</i>       | 0.042 | 0.000  | 0.000  | 0.000  | Symbiotic                         | Lichenized (Pykälä et al. 2020)                                                     |
| <i>Xylaria</i>          | 0.000 | 0.012  | 0.000  | 0.000  | Saprotrophic-Symbiotic            | Endophyte-Undefined Saprotrophic -Wood Saprotrophic                                 |

ASV = amplicon sequence variant.

### References of Supplementary Table S3

Al-Tohamy R, Kenawy ER, Sun J, Ali SS (2020) Performance of a newly isolated salt-tolerant yeast strain *Sterigmatomyces halophilus* SSA-1575 for azo dye decolorization and detoxification. Front Microbiol 11:1163

- Fleet G, Prakitchaiwattana C, Beh A, Heard G (2022) The yeast ecology of wine grapes. In: Ciani M (Ed) Biodiversity and Biotechnology of Wine Yeasts. Kerala, Research Signpost, 1-17
- Golzar, H., Thomas, G., Jayasena, K.W. et al. (2019) *Neoascochyta* species cause leaf scorch on wheat in Australia. Australasian Plant Dis Notes 14:1-5
- Frédéric Lepelletierab Karpov SA, Alacid E et al. (2014) *Dinomyces arenysensis* gen. et sp. nov. (*Rhizophydiales*, *Dinomycetaceae* fam. nov.), a chytrid infecting marine dinoflagellates. Protist 165:230-244
- Li AH, Yan FX, Groenewald M et al. (2020) Diversity and phylogeny of basidiomycetous yeasts from plant leaves and soil: Proposal of two new orders, three new families, eight new genera and one hundred and seven new species. Stud Mycol 96:17-140
- Ming C, Huang J, Wang Y et al. (2019) Revision of the medically relevant species of the yeast genus *Diutina*. Med Mycol 57:226-233
- Pykälä J, Kantelinen A, Myllys L (2020) Taxonomy of *Verrucaria* species characterized by large spores, perithecia leaving pits in the rock and a pale thin thallus in Finland. MycoKeys 72:43
- Sampaio J P (2011). *Leucosporidium* Fell, Statzell, IL Hunter & Phaff (1969). In The Yeasts, 1485-1494, Elsevier
- Saubin M, Devillers H, Proust L (2020) Investigation of genetic relationships between *Hanseniaspora* species found in grape musts revealed interspecific hybrids with dynamic genome structures. Front Microbiol 10:2960
- Sun X, Guo LD (2007) Endophytic fungi VI. *Ciliophora quercus* sp. nov. from China. Nova Hedwigia 85:403-406

**Table S4.** Comparison of fungal sequence diversity present in soils and lake sediments on Clearwater Mesa, James Ross Island.

| Type and local | Diversity indices     |                     |                                |                       |                       | Citation                |
|----------------|-----------------------|---------------------|--------------------------------|-----------------------|-----------------------|-------------------------|
|                | Number of fungal ASVs | Number of DNA reads | Fisher's- $\alpha$ (diversity) | Margalef's (richness) | Simpson's (dominance) |                         |
| Soils          |                       |                     |                                |                       |                       |                         |
| Site 1         | 25                    | 15,636              | 10.7                           | 5.21                  | 0.81                  | Current study           |
| Site 2         | 59                    | 56,473              | 60.43                          | 12.6                  | 0.83                  |                         |
| Site 3         | 39                    | 38,575              | 23.51                          | 8.25                  | 0.84                  |                         |
| Site 4         | 31                    | 17,090              | 15.39                          | 6.51                  | 0.86                  |                         |
| Lake sediments |                       |                     |                                |                       |                       |                         |
| Lilia          | 84                    | 32,428              | 247.7                          | 18.02                 | 0.77                  | Gonçalves et al. (2022) |
| Cecilia        | 64                    | 27,730              | 76.66                          | 13.68                 | 0.81                  |                         |
| Soledad        | 58                    | 28,571              | 57.66                          | 12.38                 | 0.87                  |                         |
| Adriana        | 43                    | 22,012              | 28.61                          | 9.12                  | 0.68                  |                         |
| Katerina       | 51                    | 54,939              | 22.1                           | 9.44                  | 0.79                  | de Souza et al. (2022)  |
| Florencia      | 171                   | 46,813              | 559.7                          | 32.09                 | 0.92                  |                         |

ASV = amplicon sequence variant.
